# Navigating the global egg shortage: a comprehensive study of interconnected challenges

Gunjan K<sup>1,2+</sup>, Ramendra Pati Pandey<sup>4+</sup>, Himanshu<sup>1,2</sup>, Riya Mukherjee<sup>1,2</sup>, Chung-Ming Chang<sup>2,3\*</sup>

<sup>1</sup>Graduate Institute of Biomedical Sciences, Chang Gung University, No. 259, Wenhua 1<sup>st</sup> Road, Guishan Dist. Taoyuan city 33302, Taiwan (R.O.C).

<sup>2</sup>Master & Ph.D. Program in Biotechnology Industry, Chang Gung University, No. 259, Wenhua 1<sup>st</sup> Road, Guishan Dist. Taoyuan city 33302, Taiwan (R.O.C).

<sup>3</sup>Department of Medical Biotechnology and Laboratory Science, Chang Gung University, No. 259, Wenhua 1<sup>st</sup> Road, Guishan Dist. Taoyuan city 33302, Taiwan (R.O.C).

<sup>4</sup>School of Health Sciences and Technology (SoHST) UPES, Bidholi, Dehradun, 248007 Uttarakhand, India.

## **+Contributed equally as first authorship**

Gunjan K<sup>+</sup>, Graduate Institute of Biomedical Sciences, Chang Gung University, No. 259, Wenhua 1<sup>st</sup> Road, Guishan Dist. Taoyuan city 33302, Taiwan (R.O.C).

Ramendra Pati Pandey<sup>+</sup>, School of Health Sciences and Technology (SoHST) UPES, Bidholi, Dehradun, 248007 Uttarakhand, India

## **\*Corresponding authors with equal contribution:**

Chung-Ming Chang\*, Master & Ph.D. program in Biotechnology Industry, Chang Gung University, No.259, Wenhua 1<sup>st</sup> Rd., Guishan Dist. Taoyuan City 33302, Taiwan (R.O.C.), [cmchang@mail.cgu.edu.tw](mailto:cmchang@mail.cgu.edu.tw) (C.M.C.);

25 **ABSTRACT**

26 Poultry eggs are a critical source of protein, vitamins, and minerals for people worldwide; facing  
27 the current global egg shortage is a significant concern. The shortage results from various  
28 factors, including avian flu outbreaks, changes in consumer demand, and supply chain  
29 disruptions caused by the COVID-19 pandemic. The economic crisis caused by the pandemic has  
30 also impacted the availability and affordability of eggs, particularly in low-income countries. The  
31 global egg shortage has implications for public health, particularly for vulnerable populations  
32 who rely on eggs for essential nutrients. One Health, an approach that recognizes the  
33 interconnectedness of human, animal, and environmental health, provides a useful framework for  
34 understanding and addressing the egg shortage. One Health approach to the egg shortage  
35 involves collaboration between agriculture and environmental sectors to address the root causes  
36 of the lack and ensure the sustainable production and distribution of eggs. Addressing the global  
37 egg shortage requires a multifaceted approach considering the complex social, economic, and  
38 environmental factors. One Health perspective offers a way to understand and address the  
39 interconnected factors contributing to the shortage to ensure access to affordable, nutritious eggs  
40 for all in a healthy way.

41 **KEY WORDS:** Egg shortage, Poultry supply chain, Influenza, Economic crisis, One Health  
42 surveillance.

## 44 INTRODUCTION

45 Poultry eggs and meat are the most abundant and primary animal protein sources in the human  
46 diet. The egg is regarded as a low-cost, entirely healthy food and a nutritional powerhouse. Both  
47 egg whites and yolk are high in protein. It accounts for around 12.6% of an egg's consumable  
48 portion. A, B, E, and K vitamins are also present in eggs. Additionally, eggs include significant  
49 amounts of selenium, an antioxidant essential for thyroid, immunological, and mental health as  
50 well as zinc, iron, vitamin D, B6 and B12 (Wang et al., 2017). The poultry industry is expanding  
51 and becoming more industrialized in many world regions. Growth has been driven by an  
52 expanding population, increased purchasing power, and urbanization (View of Major Problems  
53 and Challenges of Egg Production and Marketing in Bangladesh, n.d.).

54 Throughout the previous two decades, the worldwide chicken and egg trade has increased, and  
55 poultry meat and egg remain the most traded animal protein(AGRIS, n.d.). In the poultry sector,  
56 egg production is being impeded by a major global scarcity. The cost of eggs and egg products is  
57 growing due to Influenza, lack of supply, an increase in the cost of fuel, feed, and packing, and  
58 the manufacturing cost, which are the main factors which lead to running short of eggs in several  
59 countries(Egg Shortages and Price Increases Caused in Part by Bird Flu Outbreak - The New  
60 York Times, n.d.). The increased cost of eggs results in a price increases for food and  
61 confectionery products including eggs as a part of the product. Buyers will face additional  
62 challenges as food prices rise. Since October 2021, about 21 million poultry cases have been  
63 reported to the World Organization for Animal Health (WOAH, formerly known as the OIE) in  
64 various parts of the world(Egg Prices on the Rise: The Effects of Animal Diseases – WOAH –  
65 World Organisation for Animal Health, n.d.). Although avian flu is not a new threat, wild birds  
66 don't typically get sick from the virus, but the current circulating strain seems more  
67 virulent(Blagodatski et al., 2021). Highly pathogenic avian influenza (HPAI) or “bird flu” is the  
68 chief culprit; it can spread swiftly from flock to flock and is fatal in hens. A global pandemic of  
69 HPAI viruses of the H5 and H7 subtypes is a worldwide public health problems (Li et al., 2014)  
70 and a significant economic loss in the chicken sector(Otte et al., 2008). The avian flu outbreak is  
71 the worst in the history of the United States, United Kingdom (UK), and Europe the and also 27  
72 European countries (EU). For the first time, it has across the Atlantic, reaching Canada and the  
73 United States (USA), according to the Global food consumer form(Worldwide Egg Shortage

74 Due to Several Reasons Raises Prices in Global Supermarkets - Global Food Consumers Forum,  
75 n.d.).

76 The price and shortage of eggs can have a significant impact on a nation's economy, particularly  
77 in countries where eggs are a staple food and a significant source of protein for the  
78 population(Henchion et al., 2017). As egg availability declines and costs rise, households that  
79 depend on eggs as a primary protein source may find it difficult to purchase enough to meet their  
80 nutritional needs. The shortage may severely impact poultry farmers, forcing them to slaughter  
81 birds or reduce production. This could result in lower income for poultry producers and, as a  
82 result, more economic hardship for their families. Therefore the ongoing crisis in the global egg  
83 supply can also be regarded as “eggflation”.

84 The general concept of One Health (OH) is widely accepted(Mackenzie & Jeggo, 2019). OH  
85 underscores the need for a holistic and interdisciplinary approach to address the interconnected  
86 challenges of influenza outbreaks and the global egg shortage. The transmission of Influenza  
87 viruses between different species, such as birds, pigs, and humans, highlights the  
88 interconnectedness of One Health(Debnath et al., 2021). For example, certain strains of Influenza  
89 can originate in animals and then jump to humans, leading to outbreaks or pandemics. OH  
90 approach can help to address these issues by identifying and addressing the underlying factors  
91 that contribute to egg shortages or price increases, such as disease outbreaks in poultry farms or  
92 disruptions in the supply chain.

93 Despite the poultry sector, especially eggs being an integral part of the economy; regrettably, the  
94 price increase and scarcity have reduced consumer egg consumption. This study aims to  
95 highlight the scarcity of eggs the world is facing now with the OH perspective and economic  
96 crisis, which will enable us to explore the potentialities of this sub-sector.

## 97 **MATERIALS AND METHOD**

### 98 ***Research Design***

99 This market research study aimed to comprehensively analyze the Egg Food Market, focusing on  
100 scarcity of eggs in the 10 countries of the world, in these countries egg inflation is caused due to  
101 various factors including avian influenza, cage-free laws, effects of supply and demand and  
102 supply chain difficulties. Hence, we employed a quantitative method to collect, analyze, and

103 interpret the egg food related data and provided the market scenario during the period of six  
104 years.

### 105 ***Data Collection and processing***

106 This descriptive research was conducted from January 2018 to March 2023. The study  
107 exclusively relied on secondary data, sourced from a diverse array of outlets, such as industry  
108 reports, market databases, scholarly literature, governmental publications, and reputable online  
109 resources. These data sources were chosen based on their pertinence, trustworthiness, and  
110 completeness in offering insights into the Egg Food Market. The study encompassed the analysis  
111 of ten countries where the egg shortage was greatly seen: United States, United Kingdom,  
112 European Union (EU-27), Taiwan, Japan, India, Australia, Malaysia, and Jakarta.

### 113 ***Inclusion criteria***

114 To ensure the relevance and reliability of the secondary data, we employed specific selection  
115 criteria: 1) studies focusing on the global egg supply chain, including production, distribution,  
116 and consumption patterns 2) articles highlighting the impact of avian flu outbreaks on egg  
117 production and the subsequent shortage in the global egg supply data covering the past six years  
118 (from 2018 to 2023) to provide a current and comprehensive overview of market trends, 3)  
119 articles exploring the impact of factors such as avian flu outbreaks, economic factors, and supply  
120 chain disruptions on the availability and pricing of eggs, 4) Data sources with a reputation for  
121 accuracy, objectivity, and credibility, 5) Data sets that aligned with the research objectives and  
122 questions of this study.

## 123 **RESULTS**

### 124 ***Economic loss results from a global egg shortage.***

125 The egg industry is adaptable and agile, but a confluence of economic and environmental  
126 circumstances in 2022 has made things difficult. Farmers will want to meet demand but confront  
127 time constraints and cost pressures. The expense of living may rise as egg prices rise, which can  
128 affect the purchasing power of the people and lead to inflation. In addition, if a country is reliant  
129 on imports of eggs, then a shortage or price increase can create trade imbalances, as the cost of  
130 importing eggs will increase. This can lead to a drain on foreign reserves and a weakening local  
131 currency. Furthermore, the egg industry is an essential component of the agricultural sector. The  
132 shortage of eggs can affect the livelihoods of farmers and suppliers, mainly if they rely on eggs  
133 for their income. The price increase can also shift the demand for other food items and affect the

134 production of other agricultural products. Meanwhile, Eggs are a significant source of protein,  
135 and a shortage or price increase can lead to malnutrition, particularly among the low-income  
136 sections of the population. This can have a long-term impact on the health of the people and can  
137 lead to increased healthcare costs. Overall, a scarcity and hike in the price of eggs can result in a  
138 ripple effect on the economy, influencing various industries and causing significant harm to  
139 underprivileged communities that depend on eggs as a fundamental source of sustenance. The  
140 "eggflation" in many nations is illustrated country wise in the Figure 1.

#### 141 *United States*

142 The United States (USA) is facing an exacerbating scarcity of eggs caused by a combination of  
143 factors, including the highest avian flu outbreak ever recorded globally and increasing fuel, feed,  
144 and packaging costs. According to an article in The "New York Times", Since the start of 2022,  
145 HAI has killed around 58 million commercial and backyard flock birds spanning 47 states,  
146 including approximately 44 million egg laying hens in the USA since the epidemic (Egg  
147 Shortages and Price Increases Caused in Part by Bird Flu Outbreak - The New York Times, n.d.).  
148 Consumer price index, according to the "U.S. Bureau of Labor Statistics", revised on January 12,  
149 2023, egg prices have increased by up to 59.9% year on year. The average cost for a dozen large  
150 Grade A eggs in the USA in January 2022 was \$1.929. The average price had risen to \$4.823 by  
151 January. Nonetheless, it is gradually reducing to \$4.221 by February, but it is still high compared  
152 to 2022(Bureau of Labor Statistics Data, n.d.).

#### 153 *United Kingdom*

154 According to data from the British Free Range Egg Producers Association (BFREPA), with  
155 about 38 million laying hens across the country, the United Kingdom (UK) is currently 92% self-  
156 sufficient in eggs. Flock size had decreased from 44 million to around 36.7 million birds species  
157 by November 2022(Egg Producers Continue to Quit on Weekly Basis, Sector Warns -  
158 FarmingUK News, n.d.). According to government data, up to September 2022, in the third  
159 quarter of 2022, egg packaging plants in the UK packed 213 million dozens of eggs. This  
160 represents a 9.6% reduction from the third quarter of 2021 and a 4.1% decline from the second  
161 quarter of 2022. The number of eggs processed at packing stations in the third quarter of 2022  
162 declined by 9.6% from the same quarter in 2021(Historical Statistic Notices on UK Egg  
163 Production and Prices, 2022 - GOV.UK, n.d.). After seasonal adjustment, the price of eggs in the

164 United Kingdom increased by 8.5% in January 2023 compared to December. While this was a  
165 substantial and anticipated drop from December's commotion-causing 11.1% increase, it did  
166 little to mitigate a staggering 79.1% year-over-year growth. (Egg Prices Continue to Climb at  
167 Slower Pace alongside Other Food Consumed at Home, CPI Reveals, n.d.).

### 168 *European Union (EU-27)*

169 According to an article from Global Food Consumers' forum, egg prices in the EU have  
170 increased by 75% in the previous six months due to supply issues. The 99% of French people  
171 who eat eggs this year may eat fewer eggs by up to 10%. "Franceinfo" reports that beginning  
172 September 2021, the cost of a box of six eggs has increased by 13 %. Farmers in France have  
173 been forced to butcher over 770,000 animals due to the spread of avian flu. As a result, fewer  
174 chickens are available to lay eggs, which leads to a decrease in egg production (Worldwide Egg  
175 Shortage Due to Several Reasons Raises Prices in Global Supermarkets - Global Food  
176 Consumers Forum, n.d.). According to a recent European Commission report released on  
177 February 22 2023, grade A egg prices rose to 249.02 EUR/100 kg(Eggs, n.d.). According to an  
178 article in "The Economic Times", Egg prices increased the most in the Czech Republic, climbing  
179 85% year on year, followed by two other Central European countries, Hungary (80%) and  
180 Slovakia (7%). Germany (79%) and Luxembourg (79%) were on the other end of the spectrum,  
181 with both reporting 18% growth. (In the EU's Inflation Crisis, the Humble Egg Takes the Cake -  
182 The Economic Times, n.d.). According to Assosia data, a pack of six Staveley Large Free Range  
183 Eggs increased by 18.2% to £1.95 early this year, making a pack 30% more expensive than it  
184 was at the start of 2022(Why Are Eggs So Expensive RN?, n.d.).

### 185 *Taiwan*

186 Many countries are experiencing an egg shortage due to avian flu outbreaks, and Taiwan is also  
187 experiencing a severe egg shortage these days. According to an article in "Taipei Times", by the  
188 end of last year, the number of egg-laying hens in Taiwan had fallen from 45 million to 33  
189 million(Egg Shortage Calls for Cooperation - Taipei Times, n.d.). The NT\$5 per kg price  
190 increase will raise the wholesale price of duck eggs to a record high of NT\$80 per kg. According  
191 to a CNA report updated on 5th march 2023, The price of locally sourced eggs in wholesale is  
192 set to increase by NT\$3, moving from NT\$52 (equivalent to US\$1.70) to NT\$55 per catty (600  
193 grams); it is a new high this month, Simultaneously, the farm gate price will also experience a

194 NT\$3 increase, reaching NT\$45.5 per catty; initially, it was NT\$42.5 starting on Thursday  
195 (March 9) (Egg Prices in Taiwan Sizzle to All-Time High | Taiwan News | 2023-03-06 12:53:00,  
196 n.d.; Egg Prices in Taiwan to Rise Again as Shortage Continues - Focus Taiwan, n.d.; Expatriate  
197 Division, Taipei Economic and Trade Office, Jakarta, Indonesia – News, n.d.). Price increases  
198 were implemented for the second time in a month due to an egg supply constraint. According to  
199 the most recent Council of Agriculture (COA) statistics, daily egg output is 112,000 packages  
200 (200 eggs per box), falling 500,000 to 800,000 eggs short of need. To address the short-term  
201 supply shortfall, the COA launched an immediate operation in March to import five million eggs  
202 from Australia.

### 203 *Japan*

204 An avian influenza outbreak and skyrocketing feed costs are behind a shortage of chicken eggs  
205 in Japan that has led to increasing prices. Egg prices are rising due to a lack of supply. According  
206 to a "Japan Times" story, the nation experienced its first incident in October 2022, and the  
207 disease has spread to more than half of the nation's prefectures. Moreover, According to  
208 economic research firm Teikoku Databank, the wholesale egg price per kilo more than  
209 quadrupled to ¥327 in February (Rs. 197) from the previous year, Because of Tori-influenza,  
210 also known as bird flu, throughout the rest of the world-Japan Times(Explained: After US and  
211 UK, Why Japan Is Now Facing Egg Shortage, n.d.). Based on a survey conducted by the  
212 agriculture ministry, covering 470 outlets nationwide in February, the average price of a 10-egg  
213 carton was 262 yen (\$1.92). This marked an 8% increase compared to the previous month and a  
214 25% rise compared to the average February prices in recent years. (Egg Prices on the Rise as 15  
215 Million Birds Culled amid Avian Flu Scare | The Asahi Shimbun: Breaking News, Japan News  
216 and Analysis, n.d.). By February 2023, the price of a 10-egg carton had more than doubled,  
217 reaching 326 ¥ (High Egg Prices Are Hitting Japan (and Its Pancakes) - Unseen Japan, n.d.). On  
218 March 2, the agriculture ministry claimed that 15.02 million birds had to be exterminated across  
219 the country. The vast majority of these, 13.85 million, are laying hens.

### 220 *India*

221 In India, the Maharashtra animal husbandry department announced that the state is experiencing  
222 an egg shortage. As per the report of PTI news, Maharashtra consumes around 2.25 crore eggs  
223 per day and can generate 1 to 1.25 crore eggs per day. Hence, the state is experiencing a 1



224 million egg shortage daily(State Facing Shortage Of Eggs: Official | Aurangabad News - Times  
225 of India, n.d.). According to The Associated Press, The average cost of a dozen eggs across the  
226 country was \$3.59 (293.57) in November, up from \$1.72 (140.65) the previous year(This Indian  
227 State Is Facing Shortage of 1 Crore Eggs per Day | Mint, n.d.). To manage the infection from the  
228 previous year, over 43 million (4.3 crores) out of 58 million (5.8 crores) birds were culled. The  
229 prices have increased by about 25-35 per cent in just 3-4 months. To meet the current demand,  
230 eggs are being imported from Karnataka, Telangana, and Tamil Nadu.

### 231 *Australia*

232 Australia is facing a national egg scarcity, causing prices to rise and retail supplies to be in  
233 limited supply. Numerous supermarkets limit the amount of cartons of eggs purchased by each  
234 customer. Increased cost of food, employment charges, prices for electricity, and poor weather  
235 (winter) are the primary reasons of shortages and price hikes in Australia. Many farmers hesitate  
236 to raise output in an uncertain economic environment characterized by rising rates of debt and  
237 costs. According to the recent report of Global product prices, the whole average price is 2.95  
238 USD; in March 2023, it rose to USD 4.52(Australia - Eggs - Price, March 2023 |  
239 GlobalProductPrices.Com, n.d.). The shortage of eggs in the market is due to reduced  
240 production, and the pandemic avian influenza is the leading cause of the price rise.

### 241 *Other Asian countries*

242 According to the department of statistics Malaysia (DOSM)(Department of Statistics Malaysia  
243 Official Portal, n.d.), the chicken egg price is RM 6.56 per kg and RM 0.46 each in September  
244 2022. According to CNA, Malaysia experienced an egg shortage of 157 million in November, up  
245 from 118 million in October. For 30 grade A eggs, it used to cost less than RM11 (S\$3.35) a  
246 tray. The price then increased to RM13.50- as per the report of Straits Times.

247 In Jakarta's, Indonesia's traditional markets, the cost of chicken eggs increased by 30% in June,  
248 reaching 30,000 rupiahs per kg. A comparable rise has happened in Bogor and Bekasi, both in  
249 West Java- according to an article in “The Star” and “The Jakarta Post”(Egg Prices Break All-  
250 Time High, Industry Blames Bulk Social Aid Purchases - Economy - The Jakarta Post, n.d.;  
251 Topic: Indonesia | The Star, n.d.).

### 252 *Outbreaks of Avian influenza in poultry birds*

253 Recent global outbreaks of HPAI have curtailed egg supplies in the face of increased demand,  
254 fueling recent price rises. It continues to be a source of concern in the business, with marketers  
255 struggling to keep sufficient stocks on hand to meet current demand. This has become a concern  
256 in many countries, resulting in trade reductions and/or elimination for key importing and  
257 exporting countries. As illustrated in figure 2, the EU, USA, and UK are experiencing one of  
258 their greatest bird flu crises this year, with each market culling millions of birds (Avian Influenza  
259 – WOAHA – World Organisation for Animal Health, n.d.) (Adlhoch, Fusaro, Gonzales, Kuiken,  
260 Marangon, Niqueux, Staubach, Terregino, Aznar, et al., 2022; Agüero et al., 2023; Sidik, 2022).  
261 Domestic poultry throughout Asia and Europe and isolated African outbreaks will be affected  
262 from 2018 to 2021(Adlhoch, Fusaro, Gonzales, Kuiken, Marangon, Niqueux, Staubach,  
263 Terregino, Guajardo, et al., 2022; Baek et al., 2021; Peyrot et al., 2022; Poen et al., 2019;  
264 Verhagen et al., 2021).

265 The outbreaks from 2018 to 2021 witnessed the disease and fatality of a substantial number of  
266 birds, often surpassing 10,000 individuals. Figure 2 clearly depicts the occurrence of Avian  
267 Influenza (AI) in the USA, spanning from 07/2021 to 03/2023, with a noticeable decline in  
268 recent times. In Asia, there was a significant surge in outbreaks from 07/2019 to 06/2020,  
269 followed by minor fluctuations throughout 2021, culminating in a rapid decrease in 2023.  
270 Conversely, Europe experienced a gradual increase in AI outbreaks from 2019 to 2020. In the  
271 latter half of 2020, after a slight decrease, there was a substantial uptick in outbreaks from  
272 12/2020 to 06/2022, followed by a marked decline by the end of 03/2023. On the other hand,  
273 Africa exhibited a divergent pattern in the figures from 01/2018 to 01/2023. During this interval,  
274 there was a sharp increase observed from 01/2022 to 06/2022, succeeded by a pronounced  
275 decrease in AI outbreaks until 03/2023.

## 276 ***One Health***

277 One Health (OH) is a multidisciplinary strategy to preserving human, animal, and environmental  
278 health through monitoring, prevention, and mitigation. OH's major purpose is to attain optimal  
279 health and sustainability for humans, animals, and the environment.(Prata et al., 2022; Sharifi &  
280 Karamouzian, 2014). Yet, due to the substantial distance between animal and human health,  
281 multi-sectoral cooperation in surveillance and controlling new infectious diseases is difficult to  
282 achieve. To close this gap, the EU and the USA have contributed money to encourage

283 interdisciplinary research under the OH paradigm, such as research on therapies for new zoonotic  
284 diseases and early warning systems of animal risks to humans. Given the importance of the OH  
285 strategy in minimizing the public health danger posed by new infectious diseases and current  
286 international trends, its implementation through multi-sectoral collaborative initiatives should be  
287 discussed regularly. It is crucial to continue investigating the epidemiology of human and avian  
288 influenza circulation and hazards by implementing and strengthening an OH strategy for  
289 influenza surveillance. In this regard, many organizations worked globally and regionally to  
290 combat these epidemics and pandemics.

291 For influenza, the World Health Organization (WHO), the Food and Agricultural Organization  
292 (FAO), and the World Organization for Animal Health are the three international organizations  
293 (OIE) primarily responsible for avian flu surveillance and management, and overseeing public  
294 health, food safety, and animal health, respectively. (Chien, 2013). The 2010 Tripartite  
295 Agreement Concept Note outlined a collaborative strategic direction for the three organizations  
296 to pursue and their shared resolve to collaborate more closely in support of countries. FAO, OIE,  
297 and WHO reiterated their commitment in 2017, highlighting advances in zoonotic influenza  
298 prevention and control while committing to maintain this pace (OIE, FAO and WHO Enlarge  
299 Their Collaboration Commitment to Face Health Challenges – WOAHA – World Organisation for  
300 Animal Health, n.d.). The WHO's Global Influenza Programme (GIP) establishes global  
301 influenza surveillance guidelines. Furthermore, GIP gathers and analyses global virological and  
302 epidemiological influenza monitoring data (WHO EMRO | Influenza Surveillance | Influenza |  
303 Health Topics, n.d.). Due to the constantly evolving nature of influenza viruses, the Global  
304 Influenza Surveillance and Response System (GISRS) is also working to combat this threat. It is  
305 a WHO-coordinated network of public health laboratories. GISRS (conducts continuous  
306 surveillance of influenza viruses throughout the year. It observes the evolution of these viruses  
307 and provides recommendations related to laboratory diagnostics, vaccinations, antiviral  
308 susceptibility testing, and risk assessment. Moreover, GISRS serves as a global alert system to  
309 identify influenza viruses that could potentially cause pandemics and also has broader  
310 implications for emerging respiratory diseases like SARS-CoV and the Middle East respiratory  
311 syndrome coronavirus. (MERS-CoV) (Global Influenza Strategy 2019–2030, n.d.) In addition,  
312 Global Action Plan for Influenza Vaccines (GAP), it represents an all-encompassing plan to  
313 eliminate worldwide shortages. and inequitable access to pandemic influenza vaccinations

314 through three primary approaches: increasing evidence-based seasonal vaccine usage, increasing  
315 vaccine production capacity; and promoting research and development of more effective  
316 vaccines (Geneva & Switzerland, n.d.). The country-wise surveillance system of OH is also  
317 illustrated in Table 1.

## 318 **DISCUSSION**

319 The global egg shortage has emerged as a critical concern with far-reaching implications, and it  
320 is crucial to understand the factors driving this crisis in egg availability. Our study aims to shed  
321 light on the current global egg shortage, examining it through the lenses of the OH perspective  
322 and the economic crises unfolding in different countries. Nonetheless, several factors, such as  
323 avian influenza outbreaks, legislation promoting cage-free egg production, fluctuations in supply  
324 and demand, and complications in the supply chain, have all played a role in the current egg  
325 availability crisis.

326 One significant factor contributing to this shortage is the devastating impact of avian influenza,  
327 particularly the highly pathogenic strains (HPAI), on poultry farms worldwide. After introducing  
328 severe acute respiratory syndrome coronavirus 2 (SARS-CoV-2), seasonal influenza virus  
329 circulation declined dramatically in 2020-21 but increased in 2021-22. This virus has caused the  
330 culling of millions of birds, leading to a sharp decline in egg production and subsequently  
331 driving up prices due to unrelenting demand (Uyeki et al., 2022).

332 Furthermore, the shift towards cage-free housing systems has gained momentum, especially in  
333 the USA, as it is believed to offer improved living conditions for hens (Lin et al., 2017). By the  
334 end of 2019, approximately 80% of table egg-laying chickens were raised in cage systems,  
335 commonly known as conventional production. The remaining 20% were produced as specialty  
336 eggs, with cage-free eggs being the most prevalent category among them. (Egg Industry Center,  
337 2019). The significant advancement in cage-free production is due to (1) recent regulation  
338 compelling farmers to transition from traditional to cage-free production and (2) pledges by huge  
339 egg buyers such as McDonald's, Walmart, Starbucks, and more than 200 restaurants and  
340 supermarkets to utilize cage-free products alone by 2025. (Markets Insider 2017). If the  
341 commitments made by the participants are kept, around 75% of the laying eggs flock must be  
342 cage-free by 2025. Most consumers are only willing to pay an extra \$0.30 per dozen for cage-  
343 free eggs. Still, the average premium is \$1.16 per dozen, demonstrating that only a small fraction  
344 of buyers are prepared to pay big profits for the cage-free label, and the market share for cage-

345 free eggs can expand above its current level even at prices as high as \$1.00 per dozen. (Lusk,  
346 2019). This transition, driven in part by animal welfare legislation and commitments from major  
347 egg buyers, has disrupted the traditional supply chain, with implications for egg prices. The  
348 challenge lies in consumers' willingness to pay a premium for cage-free eggs, which has a ripple  
349 effect on the price of conventional eggs.

350 The delicate balance between supply and demand is another critical element in the egg  
351 availability equation. As the world's population grows, so does the demand for eggs and other  
352 protein sources, resulting in the need for increased production. However, the gap between supply  
353 and demand has widened, leading to shortages in some regions. To meet their needs, several  
354 countries are now importing eggs from others, creating a complex global egg trade network. In  
355 India, for example, there is an egg scarcity in Maharashtra; thus, the other states it is importing  
356 eggs from Karnataka, Telangana, and Tamil Nadu. Similarly, on March 10, 2023, Taiwan began  
357 importing eggs from eight countries, including the USA, Australia, Japan, Brazil, Turkey,  
358 Thailand, the Philippines, and Malaysia. Furthermore, according to the Observatory of economic  
359 complexity (OCE), the UK is also importing eggs from The USA (£506k or 27.9%), Spain  
360 (£84.4k or 48.1%), and Poland (£33.3k or 20.1%) (in November 2022)(Eggs in United Kingdom  
361 | OEC - The Observatory of Economic Complexity, n.d.), and Japan is also importing eggs from  
362 Hong Kong (484 million), Singapore (14.5 million), Taiwan (4.75 million), and the USA  
363 (251,000), and were primarily imported from China (19 million), Taiwan (13.8 million),  
364 Germany (4.32 million), and the USA (1.58 million)(Eggs in Japan | OEC - The Observatory of  
365 Economic Complexity, n.d.). In addition, in 2020, many countries experienced egg shortages due  
366 to the coronavirus disease 2019 (COVID-19) pandemic, which disrupted supply chains and led to  
367 changes in consumer demand. At the beginning of the pandemic, panic buying led to a surge in  
368 egg demand, causing shortages in some areas. However, as lockdowns and economic disruptions  
369 continued, demand for eggs declined, leading to oversupply in some regions and reduced  
370 production in others.

371 Supply chain disruptions have further exacerbated the egg crisis. Complex supply chain  
372 structures and shortages of essential supplies and transportation have made it challenging for  
373 national egg producers to meet the growing demand, leading to price hikes and supply shortages.  
374 Chicken mortality rates have added to this supply/demand conflict, leaving consumers facing  
375 higher prices and, at times, empty shelves.

376 In essence, the production of eggs involves a highly intricate supply chain that extends beyond  
377 just birds, feed, water, and land. The pandemic, with its impact on labor, construction costs, and  
378 the severe outbreak of HPAI, has exposed unresolved supply chain issues in the egg sector.  
379 Rising costs and the recent surge in avian influenza have further aggravated the egg shortage,  
380 leaving us with a complex and multifaceted problem that necessitates comprehensive analysis  
381 and innovative solutions.

## 382 **CONCLUSIONS**

383 The shortage and price increase of eggs can have a cascading effect on the economy, affecting  
384 multiple sectors. It can be particularly devastating for low-income sections of the population who  
385 rely on eggs as a primary source of nutrition. To address egg shortages, governments may take  
386 actions such as importing eggs from other countries, providing subsidies to farmers, or  
387 implementing policies to encourage increased production. Additionally, consumers may reduce  
388 their egg consumption or switch to alternative protein sources during a shortage. The egg  
389 scarcity has demonstrated to egg growers and food sector manufacturers that there is still much  
390 opportunity for development and an overall requirement for domesticated and localized supply  
391 chain fulfilment techniques. Importing eggs is not a solution for this type of shortage; every  
392 country should employ some measures to control influenza as it directly linked with poultry, egg  
393 and humans.

394 **AUTHOR CONTRIBUTIONS:** All authors contributed to writing-original draft preparation,  
395 review and editing.

396 **FUNDING:** This research was funded by VtR Inc-CGU (SCRPD1L0221); DOXABIO-CGU  
397 (SCRPD1K0131), and CGU grant (UZRPD1L0011, UZRPD1M0081).

398 **INSTITUTIONAL REVIEW BOARD STATEMENT:** -Not applicable

399 **INFORMED CONSENT STATEMENT:** Not applicable

400 **CONFLICTS OF INTEREST:** The authors confirm that there are no conflicts of interest.

402 **REFERENCES**

- 403 Adlhoch, C., Fusaro, A., Gonzales, J. L., Kuiken, T., Marangon, S., Niqueux, É., Staubach, C.,  
404 Terregino, C., Aznar, I., Guajardo, I. M., & Baldinelli, F. (2022). Avian influenza overview  
405 March – June 2022. *EFSA Journal*, 20(8). <https://doi.org/10.2903/J.EFSA.2022.7415>
- 406 Adlhoch, C., Fusaro, A., Gonzales, J. L., Kuiken, T., Marangon, S., Niqueux, É., Staubach, C.,  
407 Terregino, C., Guajardo, I. M., Chuzhakina, K., & Baldinelli, F. (2022). Avian influenza  
408 overview June – September 2022. *EFSA Journal*, 20(10).  
409 <https://doi.org/10.2903/J.EFSA.2022.7597>
- 410 AGRIS. (n.d.). Retrieved March 30, 2023, from <https://agris.fao.org/agris-search/index.do>
- 411 Agüero, M., Monne, I., Sánchez, A., Zecchin, B., Fusaro, A., Ruano, M. J., Del Valle Arrojo, M.,  
412 Fernández-Antonio, R., Souto, A. M., Tordable, P., Cañas, J., Bonfante, F., Giussani, E.,  
413 Terregino, C., & Orejas, J. J. (2023). Highly pathogenic avian influenza A(H5N1) virus  
414 infection in farmed minks, Spain, October 2022. *Euro Surveillance : Bulletin European Sur*  
415 *Les Maladies Transmissibles = European Communicable Disease Bulletin*, 28(3).  
416 <https://doi.org/10.2807/1560-7917.ES.2023.28.3.2300001>
- 417 Australia - Eggs - price, March 2023 | GlobalProductPrices.com. (n.d.). Retrieved March 30,  
418 2023, from [https://www.globalproductprices.com/Australia/egg\\_prices/](https://www.globalproductprices.com/Australia/egg_prices/)
- 419 Avian Influenza – WOA – World Organisation for Animal Health. (n.d.). Retrieved March 31,  
420 2023, from <https://www.woah.org/en/disease/avian-influenza/#ui-id-2>
- 421 Avian Influenza Control Programme in Indonesia. Annual Report 2008. (n.d.). Retrieved March  
422 31, 2023, from [https://www.fao.org/documents/card/fr/c/ec93e780-2529-4ea9-af88-](https://www.fao.org/documents/card/fr/c/ec93e780-2529-4ea9-af88-a0fa5dd2f33f/)  
423 [a0fa5dd2f33f/](https://www.fao.org/documents/card/fr/c/ec93e780-2529-4ea9-af88-a0fa5dd2f33f/)
- 424 Baek, Y. G., Lee, Y. N., Lee, D. H., Shin, J. I., Lee, J. H., Chung, D. H., Lee, E. K., Heo, G. B.,  
425 Sagong, M., Kye, S. J., Lee, K. N., Lee, M. H., & Lee, Y. J. (2021). Multiple Reassortants  
426 of H5N8 Clade 2.3.4.4b Highly Pathogenic Avian Influenza Viruses Detected in South  
427 Korea during the Winter of 2020-2021. *Viruses*, 13(3). <https://doi.org/10.3390/V13030490>
- 428 Blagodatski, A., Trutneva, K., Glazova, O., Mityaeva, O., Shevkova, L., Kegeles, E., Onyanov,  
429 N., Fede, K., Maznina, A., Khavina, E., Yeo, S. J., Park, H., & Volchkov, P. (2021). Avian  
430 influenza in wild birds and poultry: Dissemination pathways, monitoring methods, and virus  
431 ecology. *Pathogens*, 10(5). <https://doi.org/10.3390/PATHOGENS10050630>
- 432 Bureau of Labor Statistics Data. (n.d.). Retrieved March 30, 2023, from  
433 <https://data.bls.gov/timeseries/APU0000708111>
- 434 Chien, Y. J. (2013). How Did International Agencies Perceive the Avian Influenza Problem? The  
435 Adoption and Manufacture of the ‘One World, One Health’ Framework. *Pandemics and*  
436 *Emerging Infectious Diseases: The Sociological Agenda*, 46–58.  
437 <https://doi.org/10.1002/9781118553923.CH5>
- 438 Debnath, F., Chakraborty, D., Deb, A., Saha, M., & Dutta, S. (2021). Increased human-animal  
439 interface & emerging zoonotic diseases: An enigma requiring multi-sectoral efforts to  
440 address. *The Indian Journal of Medical Research*, 153(5&6), 577–584.  
441 [https://doi.org/10.4103/IJMR.IJMR\\_2971\\_20](https://doi.org/10.4103/IJMR.IJMR_2971_20)
- 442 Department of Statistics Malaysia Official Portal. (n.d.). Retrieved March 30, 2023, from  
443 [https://www.dosm.gov.my/v1/index.php?r=column/cthemByCat&cat=511&bul\\_id=MW9k](https://www.dosm.gov.my/v1/index.php?r=column/cthemByCat&cat=511&bul_id=MW9kdjRHZi9RUDRKeHh5WGQwN3ZkUT09&menu_id=bThzTHQxN1ZqMVF6a2I4RkZoND FkQT09)  
444 [djRHZi9RUDRKeHh5WGQwN3ZkUT09&menu\\_id=bThzTHQxN1ZqMVF6a2I4RkZoND](https://www.dosm.gov.my/v1/index.php?r=column/cthemByCat&cat=511&bul_id=MW9kdjRHZi9RUDRKeHh5WGQwN3ZkUT09&menu_id=bThzTHQxN1ZqMVF6a2I4RkZoND FkQT09)  
445 [FkQT09](https://www.dosm.gov.my/v1/index.php?r=column/cthemByCat&cat=511&bul_id=MW9kdjRHZi9RUDRKeHh5WGQwN3ZkUT09&menu_id=bThzTHQxN1ZqMVF6a2I4RkZoND FkQT09)
- 446 Egg prices break all-time high, industry blames bulk social aid purchases - Economy - The  
447 Jakarta Post. (n.d.). Retrieved March 30, 2023, from

448 [https://www.thejakartapost.com/business/2022/08/24/egg-prices-break-all-time-high-](https://www.thejakartapost.com/business/2022/08/24/egg-prices-break-all-time-high-industry-blames-bulk-social-aid-purchases.html)  
449 [industry-blames-bulk-social-aid-purchases.html](https://www.thejakartapost.com/business/2022/08/24/egg-prices-break-all-time-high-industry-blames-bulk-social-aid-purchases.html)  
450 Egg prices continue to climb at slower pace alongside other food consumed at home, CPI  
451 reveals. (n.d.). Retrieved March 30, 2023, from  
452 [https://www.feednavigator.com/Article/2023/02/14/egg-prices-continue-to-climb-at-slower-](https://www.feednavigator.com/Article/2023/02/14/egg-prices-continue-to-climb-at-slower-pace-alongside-other-food-consumed-at-home-cpi-reveals)  
453 [pace-alongside-other-food-consumed-at-home-cpi-reveals](https://www.feednavigator.com/Article/2023/02/14/egg-prices-continue-to-climb-at-slower-pace-alongside-other-food-consumed-at-home-cpi-reveals)  
454 Egg prices in Taiwan sizzle to all-time high | Taiwan News | 2023-03-06 12:53:00. (n.d.).  
455 Retrieved March 30, 2023, from <https://www.taiwannews.com.tw/en/news/4827709>  
456 Egg prices in Taiwan to rise again as shortage continues - Focus Taiwan. (n.d.). Retrieved March  
457 30, 2023, from <https://focustaiwan.tw/business/202303050013>  
458 Egg prices on the rise: the effects of animal diseases – WOA – World Organisation for Animal  
459 Health. (n.d.). Retrieved March 30, 2023, from [https://www.woah.org/en/article/egg-prices-](https://www.woah.org/en/article/egg-prices-on-the-rise-the-effects-of-animal-diseases/)  
460 [on-the-rise-the-effects-of-animal-diseases/](https://www.woah.org/en/article/egg-prices-on-the-rise-the-effects-of-animal-diseases/)  
461 Egg prices on the rise as 15 million birds culled amid avian flu scare | The Asahi Shimbun:  
462 Breaking News, Japan News and Analysis. (n.d.). Retrieved March 30, 2023, from  
463 <https://www.asahi.com/ajw/articles/14852803>  
464 Egg producers continue to quit on weekly basis, sector warns - FarmingUK News. (n.d.).  
465 Retrieved March 30, 2023, from [https://www.farminguk.com/news/egg-producers-continue-](https://www.farminguk.com/news/egg-producers-continue-to-quit-on-weekly-basis-sector-warns_61952.html)  
466 [to-quit-on-weekly-basis-sector-warns\\_61952.html](https://www.farminguk.com/news/egg-producers-continue-to-quit-on-weekly-basis-sector-warns_61952.html)  
467 Egg shortage calls for cooperation - Taipei Times. (n.d.). Retrieved March 30, 2023, from  
468 <https://www.taipetimes.com/News/editorials/archives/2023/03/06/2003795551>  
469 Egg Shortages and Price Increases Caused in Part by Bird Flu Outbreak - The New York Times.  
470 (n.d.). Retrieved March 30, 2023, from [https://www.nytimes.com/2023/01/12/us/egg-](https://www.nytimes.com/2023/01/12/us/egg-shortage-us.html)  
471 [shortage-us.html](https://www.nytimes.com/2023/01/12/us/egg-shortage-us.html)  
472 Eggs. (n.d.). Retrieved March 30, 2023, from [https://agriculture.ec.europa.eu/farming/animal-](https://agriculture.ec.europa.eu/farming/animal-products/eggs_en)  
473 [products/eggs\\_en](https://agriculture.ec.europa.eu/farming/animal-products/eggs_en)  
474 Eggs in Japan | OEC - The Observatory of Economic Complexity. (n.d.). Retrieved March 30,  
475 2023, from <https://oec.world/en/profile/bilateral-product/eggs/reporter/jpn>  
476 Eggs in United Kingdom | OEC - The Observatory of Economic Complexity. (n.d.). Retrieved  
477 March 30, 2023, from <https://oec.world/en/profile/bilateral-product/eggs/reporter/gbr>  
478 European Influenza Surveillance Network (EISN). (n.d.). Retrieved March 31, 2023, from  
479 [https://www.ecdc.europa.eu/en/about-us/partnerships-and-networks/disease-and-laboratory-](https://www.ecdc.europa.eu/en/about-us/partnerships-and-networks/disease-and-laboratory-networks/eisn)  
480 [networks/eisn](https://www.ecdc.europa.eu/en/about-us/partnerships-and-networks/disease-and-laboratory-networks/eisn)  
481 Expatriate Division, Taipei Economic and Trade Office, Jakarta, Indonesia – News. (n.d.).  
482 Retrieved March 30, 2023, from  
483 [https://www.ocac.gov.tw/OCAC/SubSites/Pages/Detail.aspx?site=bf7c679c-ac68-4740-](https://www.ocac.gov.tw/OCAC/SubSites/Pages/Detail.aspx?site=bf7c679c-ac68-4740-84d2-4bc1f4735f8b&nodeid=1743&pid=51654996)  
484 [84d2-4bc1f4735f8b&nodeid=1743&pid=51654996](https://www.ocac.gov.tw/OCAC/SubSites/Pages/Detail.aspx?site=bf7c679c-ac68-4740-84d2-4bc1f4735f8b&nodeid=1743&pid=51654996)  
485 Explained: After US and UK, why Japan is now facing egg shortage. (n.d.). Retrieved March 30,  
486 2023, from [https://www.firstpost.com/explainers/explained-after-us-and-uk-why-japan-is-](https://www.firstpost.com/explainers/explained-after-us-and-uk-why-japan-is-now-facing-egg-shortage-12266472.html)  
487 [now-facing-egg-shortage-12266472.html](https://www.firstpost.com/explainers/explained-after-us-and-uk-why-japan-is-now-facing-egg-shortage-12266472.html)  
488 Geneva, & Switzerland. (n.d.). Report of the second WHO Consultation on the Global Action  
489 Plan for Influenza Vaccines (GAP) P G A.  
490 Global Influenza Strategy 2019–2030. (n.d.). Retrieved March 30, 2023, from  
491 <https://www.who.int/publications/i/item/9789241515320>  
492 Henchion, M., Hayes, M., Mullen, A. M., Fenelon, M., & Tiwari, B. (2017). Future Protein  
493 Supply and Demand: Strategies and Factors Influencing a Sustainable Equilibrium. Foods



- 494 2017, Vol. 6, Page 53, 6(7), 53. <https://doi.org/10.3390/FOODS6070053>
- 495 High Egg Prices Are Hitting Japan (and Its Pancakes) - Unseen Japan. (n.d.). Retrieved March  
496 31, 2023, from <https://unseenjapan.com/rising-egg-prices-japan-pancakes/>
- 497 Historical statistic notices on UK egg production and prices, 2022 - GOV.UK. (n.d.). Retrieved  
498 March 30, 2023, from <https://www.gov.uk/government/statistics/historical-statistic-notice-on-uk-egg-production-and-prices-2022>
- 499
- 500 In the EU's inflation crisis, the humble egg takes the cake - The Economic Times. (n.d.).  
501 Retrieved March 30, 2023, from  
502 <https://economictimes.indiatimes.com/news/international/world-news/in-the-eus-inflation-crisis-the-humble-egg-takes-the-cake/articleshow/98545894.cms?from=mdr>
- 503
- 504 Li, X., Zhang, Z., Yu, A., Ho, S. Y. W., Carr, M. J., Zheng, W., Zhang, Y., Zhu, C., Lei, F., &  
505 Shi, W. (2014). Global and local persistence of influenza A(H5N1) Virus. *Emerging*  
506 *Infectious Diseases*, 20(8), 1287–1295. <https://doi.org/10.3201/EID2008.130910>
- 507 Lin, X., Zhang, R., Jiang, S., El-Mashad, H., & Xin, H. (2017). Emissions of ammonia, carbon  
508 dioxide and particulate matter from cage-free layer houses in California. *Atmospheric*  
509 *Environment*, 152, 246–255. <https://doi.org/10.1016/j.atmosenv.2016.12.018>
- 510 Ludwig, S., Zell, R., Schwemmler, M., & Herold, S. (2014). Influenza, a One Health paradigm-  
511 Novel therapeutic strategies to fight a zoonotic pathogen with pandemic potential.  
512 *International Journal of Medical Microbiology*, 304(7), 894–901.  
513 <https://doi.org/10.1016/j.ijmm.2014.08.016>
- 514 Lusk, J. L. (2019). Consumer preferences for cage-free eggs and impacts of retailer pledges.  
515 *Agribusiness*, 35(2), 129–148. <https://doi.org/10.1002/AGR.21580>
- 516 Mackenzie, J. S., & Jeggo, M. (2019). The One Health Approach—Why Is It So Important?  
517 *Tropical Medicine and Infectious Disease* 2019, Vol. 4, Page 88, 4(2), 88.  
518 <https://doi.org/10.3390/TROPICALMED4020088>
- 519 OIE, FAO and WHO enlarge their collaboration commitment to face health challenges – WOA  
520 – World Organisation for Animal Health. (n.d.). Retrieved March 30, 2023, from  
521 <https://www.woah.org/en/oie-fao-and-who-enlarge-their-collaboration-commitment-to-face-health-challenges/>
- 522
- 523 Otte, J., Hinrichs, J., Rushton, J., Roland-Holst, D., & Zilberman, D. (2008). Impacts of avian  
524 influenza virus on animal production in developing countries. *CAB Reviews: Perspectives*  
525 *in Agriculture, Veterinary Science, Nutrition and Natural Resources*, 3.  
526 <https://doi.org/10.1079/PAVSNR20083080>
- 527 Peyrot, B. M., Abolnik, C., Anthony, T., & Roberts, L. C. (2022). Evolutionary dynamics of the  
528 clade 2.3.4.4B H5N8 high-pathogenicity avian influenza outbreaks in coastal seabirds and  
529 other species in southern Africa from 2017 to 2019. *Transboundary and Emerging Diseases*,  
530 69(6), 3749–3760. <https://doi.org/10.1111/tbed.14744>
- 531 Poen, M. J., Venkatesh, D., Bestebroer, T. M., Vuong, O., Scheuer, R. D., Oude Munnink, B. B.,  
532 de Meulder, D., Richard, M., Kuiken, T., Koopmans, M. P. G., Kelder, L., Kim, Y. J., Lee,  
533 Y. J., Steensels, M., Lambrecht, B., Dan, A., Pohlmann, A., Beer, M., Savic, V., ... Lewis,  
534 N. S. (2019). Co-circulation of genetically distinct highly pathogenic avian influenza A  
535 clade 2.3.4.4 (H5N6) viruses in wild waterfowl and poultry in Europe and East Asia, 2017-  
536 18. *Virus Evolution*, 5(1), vez004–vez004. <https://doi.org/10.1093/VE/VEZ004>
- 537 Prata, J. C., Rocha-Santos, T., & Ribeiro, A. I. (2022). An introduction to the concept of One  
538 Health. *One Health: Integrated Approach to 21st Century Challenges to Health*, 1–31.  
539 <https://doi.org/10.1016/B978-0-12-822794-7.00004-6>

540 Revised Action Plan 2021 for Avian Influenza | Department of Animal Husbandry & Dairying.  
541 (n.d.). Retrieved March 31, 2023, from [https://dahd.nic.in/circulars/revised-action-plan-](https://dahd.nic.in/circulars/revised-action-plan-2021-avian-influenza)  
542 [2021-avian-influenza](https://dahd.nic.in/circulars/revised-action-plan-2021-avian-influenza)

543 Search Results for – WOAHA – World Organisation for Animal Health. (n.d.). Retrieved March  
544 31, 2023, from [https://www.woah.org/en/?s=&\\_search=Japan](https://www.woah.org/en/?s=&_search=Japan)

545 Sharifi, H., & Karamouzian, M. (2014). Introducing \. *International Journal of Health Policy and*  
546 *Management*, 2(2), 101–102. <https://doi.org/10.15171/IJHPM.2014.24>

547 Sidik, S. M. (2022). Why is bird flu so bad right now? *Nature*. [https://doi.org/10.1038/D41586-](https://doi.org/10.1038/D41586-022-03322-2)  
548 [022-03322-2](https://doi.org/10.1038/D41586-022-03322-2)

549 State Facing Shortage Of Eggs: Official | Aurangabad News - Times of India. (n.d.). Retrieved  
550 March 30, 2023, from [https://timesofindia.indiatimes.com/city/aurangabad/state-facing-](https://timesofindia.indiatimes.com/city/aurangabad/state-facing-shortage-of-eggs-official/articleshow/97077703.cms)  
551 [shortage-of-eggs-official/articleshow/97077703.cms](https://timesofindia.indiatimes.com/city/aurangabad/state-facing-shortage-of-eggs-official/articleshow/97077703.cms)

552 This Indian state is facing shortage of 1 crore eggs per day | Mint. (n.d.). Retrieved March 30,  
553 2023, from [https://www.livemint.com/news/india/maharashtra-is-facing-shortage-of-1-](https://www.livemint.com/news/india/maharashtra-is-facing-shortage-of-1-crore-eggs-per-day-11674013638100.html)  
554 [crore-eggs-per-day-11674013638100.html](https://www.livemint.com/news/india/maharashtra-is-facing-shortage-of-1-crore-eggs-per-day-11674013638100.html)

555 Topic: Indonesia | The Star. (n.d.). Retrieved March 30, 2023, from  
556 <https://www.thestar.com.my/tag/indonesia>

557 USDA APHIS | 2022-2023 Detections of Highly Pathogenic Avian Influenza. (n.d.).  
558 Uyeki, T. M., Hui, D. S., Zambon, M., Wentworth, D. E., & Monto, A. S. (2022). *Influenza*. *The*  
559 *Lancet*, 400(10353), 693–706. [https://doi.org/10.1016/S0140-6736\(22\)00982-](https://doi.org/10.1016/S0140-6736(22)00982-5/ATTACHMENT/295E53E4-3E07-4EB6-A07F-8CFDA0EC3780/MMC1.PDF)  
560 [5/ATTACHMENT/295E53E4-3E07-4EB6-A07F-8CFDA0EC3780/MMC1.PDF](https://doi.org/10.1016/S0140-6736(22)00982-5/ATTACHMENT/295E53E4-3E07-4EB6-A07F-8CFDA0EC3780/MMC1.PDF)

561 Verhagen, J. H., Fouchier, R. A. M., & Lewis, N. (2021). Highly Pathogenic Avian Influenza  
562 Viruses at the Wild-Domestic Bird Interface in Europe: Future Directions for Research and  
563 Surveillance. *Viruses*, 13(2). <https://doi.org/10.3390/V13020212>

564 View of Major Problems and Challenges of Egg Production and Marketing in Bangladesh. (n.d.).  
565 Retrieved March 28, 2023, from <https://journal.safebd.org/index.php/jafe/article/view/12/10>

566 Wang, J., Yue, H., Wu, S., Zhang, H., & Qi, G. (2017). Nutritional modulation of health, egg  
567 quality and environmental pollution of the layers. *Animal Nutrition*, 3(2), 91–96.  
568 <https://doi.org/10.1016/J.ANINU.2017.03.001>

569 WHO EMRO | Influenza surveillance | Influenza | Health topics. (n.d.). Retrieved March 30,  
570 2023, from <https://www.emro.who.int/health-topics/influenza/influenza-surveillance.html>

571 Why Are Eggs So Expensive RN? (n.d.). Retrieved March 31, 2023, from  
572 <https://www.delish.com/uk/food-news/a42952571/why-are-eggs-so-expensive/>

573 WOAHA – World Organisation for Animal Health. (n.d.). Retrieved March 31, 2023, from  
574 <https://www.woah.org/en/home/>

575 Worldwide egg shortage due to several reasons raises prices in global supermarkets - Global  
576 Food Consumers Forum. (n.d.). Retrieved March 30, 2023, from  
577 <https://www.globalfoodconsumers.org/news/global-egg-scarcity/>

578 Yang, J. R., Teng, H. J., Liu, M. T., & Li, S. Y. (2017). Taiwan’s Public Health National  
579 Laboratory System: Success in Influenza Diagnosis and Surveillance. *Health Security*,  
580 15(2), 154–164. <https://doi.org/10.1089/HS.2016.0104>

581  
582

# FIGURES

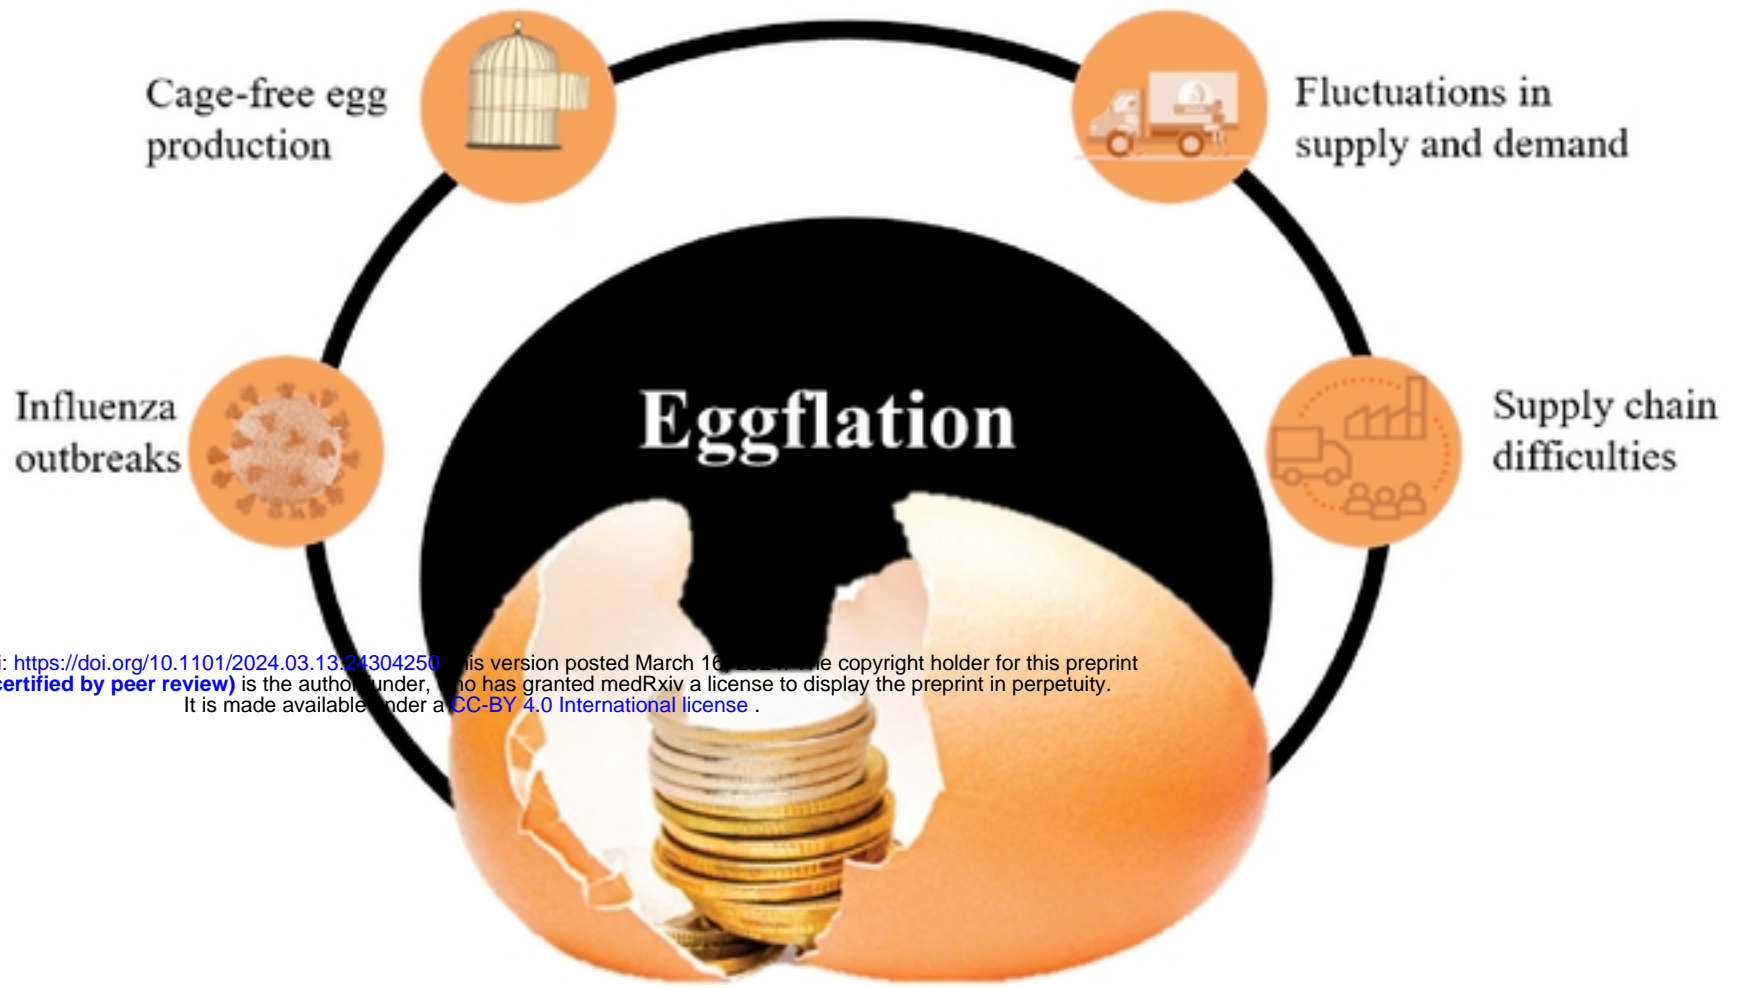

medRxiv preprint doi: <https://doi.org/10.1101/2024.03.13.24304250>; this version posted March 16, 2024. The copyright holder for this preprint (which was not certified by peer review) is the author/funder, who has granted medRxiv a license to display the preprint in perpetuity. It is made available under a [CC-BY 4.0 International license](https://creativecommons.org/licenses/by/4.0/).

**Graphical Abstract**

# FIGURES

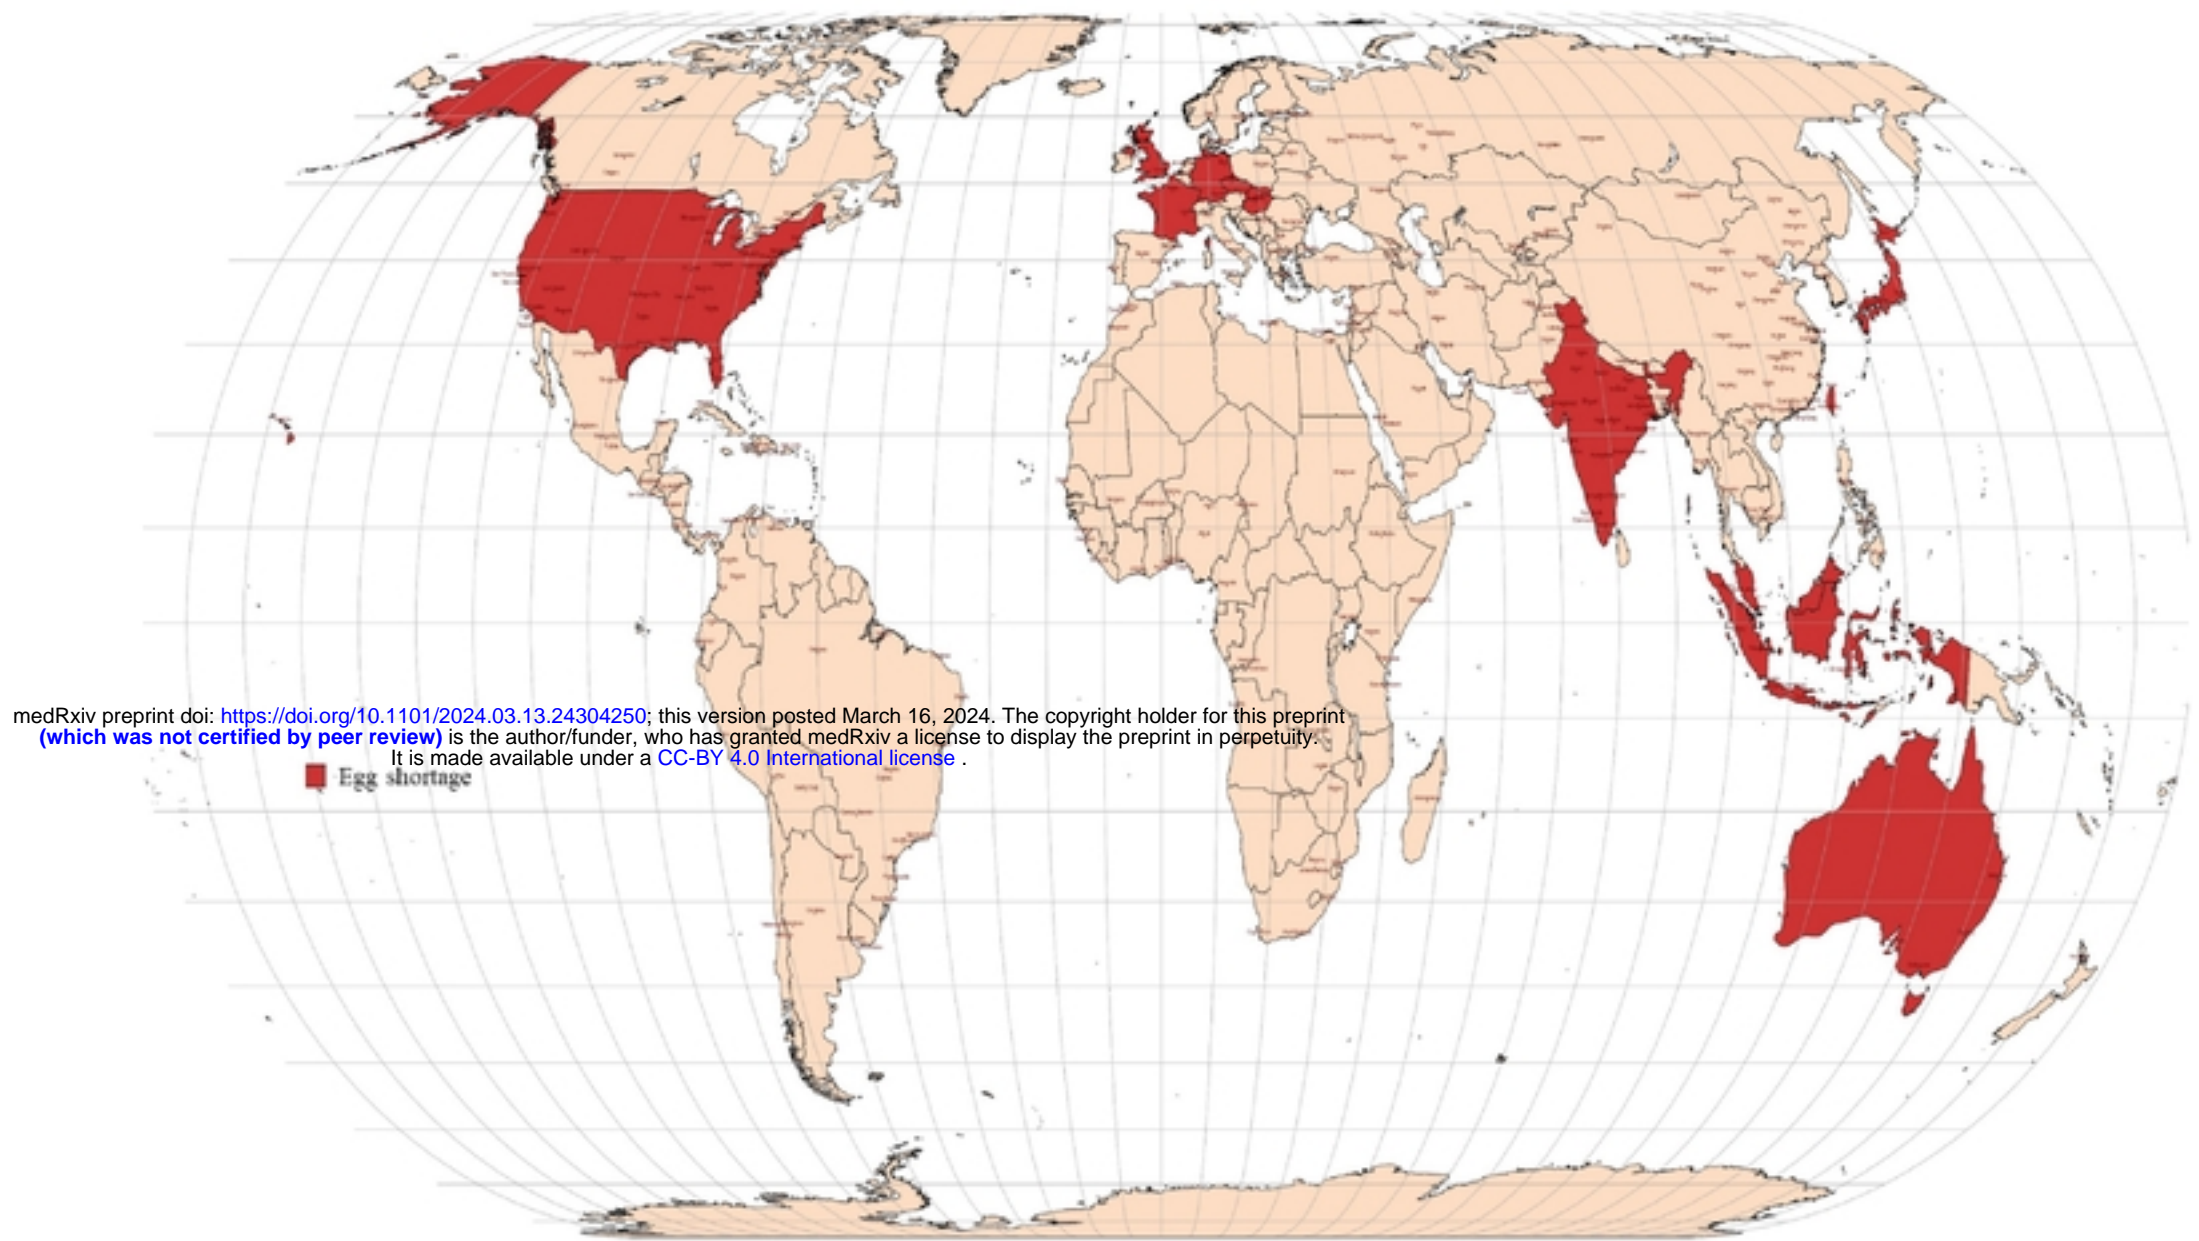

**Figure 1: Worldwide egg shortage**

# FIGURES

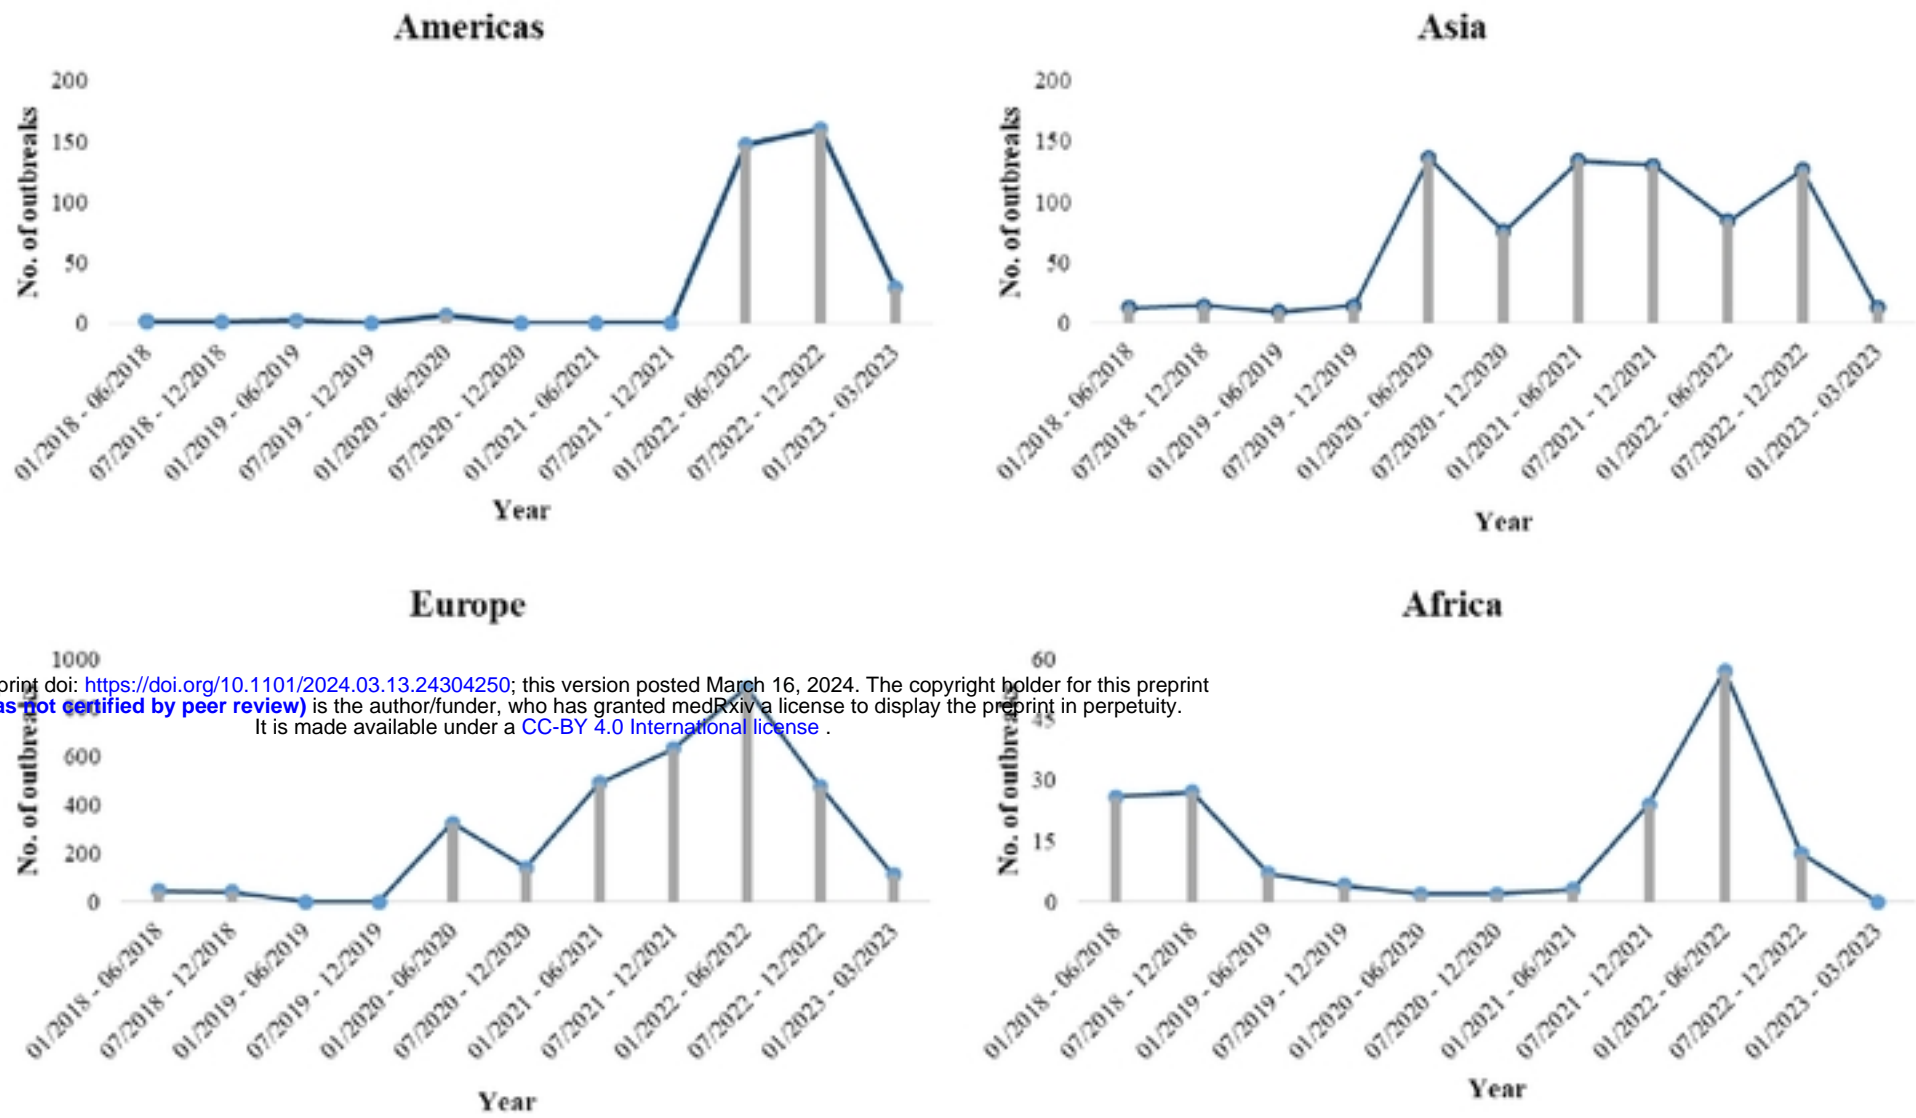

medRxiv preprint doi: <https://doi.org/10.1101/2024.03.13.24304250>; this version posted March 16, 2024. The copyright holder for this preprint (which was not certified by peer review) is the author/funder, who has granted medRxiv a license to display the preprint in perpetuity. It is made available under a [CC-BY 4.0 International license](https://creativecommons.org/licenses/by/4.0/).

**Figure 2:** Occurrence of highly pathogenic avian influenza (HPAI) outbreak events in poultry birds from 1 January 2018 to 9 March 2023. Accessed from the International Organization for Animal Health documented (OIE)(*Avian Influenza – WOAHA – World Organisation for Animal Health*, n.d.).
